# Supplementary material for: Limited Effect of Indolamine 2,3-Dioxygenase Expression and Enzymatic Activity on Lupus-Like Disease in B6.Nba2 Mice
Source: PubMed Central journal article supplement (PMC6727869; doi:10.3389/fimmu.2019.02017), 2019-08-27
Supplement: Table_1.pdf [file Table_1.pdf]

**Supplemental Table 1:** Splenic cellular composition in B6, B6.Nba2 and IDO-manipulated B6.Nba2 mice.

|                                                                     | B6 <sup>1</sup>         | B6.Nba2 <sup>2</sup> | B6.Nba2.IDO1 <sup>-/-3</sup> | B6.Nba2<br>+ 1-D-MT <sup>4</sup> | B6.Nba2.IDO1 <sup>-/-</sup><br>+ 1-D-MT <sup>5</sup> |
|---------------------------------------------------------------------|-------------------------|----------------------|------------------------------|----------------------------------|------------------------------------------------------|
| <b>Total Splenocytes in millions</b>                                | 75 ± 8.6 <sup>6</sup>   | 130 ± 15.6*          | 113 ± 11.8*                  | 100 ± 8.16(*)                    | 117 ± 23.1                                           |
| <b>Dendritic Cells</b>                                              |                         |                      |                              |                                  |                                                      |
| cDCs                                                                | 0.6 ± 0.09 <sup>6</sup> | 1.7 ± 0.20**         | 1.2 ± 0.07**.(#)             | 1.1 ± 0.10*.(#)                  | 1.1 ± 0.32                                           |
| pDCs (all)                                                          | 0.6 ± 0.1               | 1.8 ± 0.27**         | 1.6 ± 0.28(#)                | 1.2 ± 0.32                       | 1.5 ± 0.57                                           |
| CD19 <sup>+</sup> pDCs                                              | 0.3 ± 0.06              | 1.2 ± 0.28*          | 1.3 ± 0.25*                  | 0.7 ± 0.28                       | 1.2 ± 0.52                                           |
| SiglecH <sup>+</sup> pDCs                                           | 0.2 ± 0.06              | 0.3 ± 0.05           | 0.2 ± 0.04                   | 0.2 ± 0.02(#)                    | 0.3 ± 0.08                                           |
| <b>T cells</b>                                                      |                         |                      |                              |                                  |                                                      |
| CD8 <sup>+</sup>                                                    | 10.6 ± 1.41             | 15.1 ± 1.73(*)       | 11.8 ± 1.79                  | 13.0 ± 1.11                      | 12.5 ± 1.11                                          |
| CD4 <sup>+</sup> (all)                                              | 17.3 ± 3.65             | 29.0 ± 4.65(*)       | 22.9 ± 4.35                  | 23.2 ± 3.21                      | 20.9 ± 2.62                                          |
| Foxp3 <sup>+</sup> CD4 <sup>+</sup><br>Treg                         | 0.89 ± 0.27             | 2.0 ± 0.30*          | 1.5 ± 0.23                   | 1.4 ± 0.26                       | 1.5 ± 0.32                                           |
| Naïve CD4 <sup>+</sup><br>CD62L <sup>hi</sup> CD44 <sup>low</sup>   | 12.3 ± 2.52             | 13.9 ± 2.47          | 10.3 ± 2.87                  | 13.0 ± 1.99                      | 9.0 ± 0.99                                           |
| Eff-mem CD4 <sup>+</sup><br>CD62L <sup>low</sup> CD44 <sup>hi</sup> | 2.1 ± 0.44              | 8.3 ± 1.68**         | 6.8 ± 0.86**                 | 4.9 ± 0.83*.(#)                  | 6.8 ± 1.51(*)                                        |
| CD69 <sup>+</sup> CD4 <sup>+</sup>                                  | 1.3 ± 0.28              | 3.9 ± 0.81*          | 3.3 ± 0.61*                  | 2.3 ± 0.41(*)                    | 3.1 ± 0.68(*)                                        |
| <b>Myeloid cells</b>                                                |                         |                      |                              |                                  |                                                      |
| Gr1 <sup>+</sup> CD11b <sup>+</sup>                                 | 2.1 ± 0.29              | 3.3 ± 0.37*          | 5.6 ± 1.85                   | 2.5 ± 0.22                       | 3.5 ± 1.43                                           |
| F4/80 <sup>+</sup> CD11b <sup>+</sup>                               | 0.9 ± 0.19              | 0.8 ± 0.15           | 0.7 ± 0.34                   | 0.5 ± 0.06                       | 0.6 ± 0.19                                           |
| SignR1 <sup>+</sup> MΦ                                              | 0.4 ± 0.06              | 0.3 ± 0.03           | 0.3 ± 0.02                   | 0.3 ± 0.06                       | 0.2 ± 0.05                                           |
| <b>B cells</b>                                                      |                         |                      |                              |                                  |                                                      |
| All B cells                                                         | 36.5 ± 6.70             | 64.4 ± 8.02*         | 56.7 ± 7.75                  | 49.8 ± 4.77                      | 65.0 ± 16.6                                          |
| CD69 <sup>+</sup> B220 <sup>+</sup>                                 | 0.1 ± 0.02              | 0.3 ± 0.06*          | 0.3 ± 0.02**                 | 0.2 ± 0.03(*)                    | 0.2 ± 0.05                                           |
| GC B cells                                                          | 0.40 ± 0.12             | 2.38 ± 0.38**        | 1.70 ± 0.14**                | 1.59 ± 0.41*                     | 1.62 ± 0.32*                                         |
| CD138 <sup>+</sup> B220 <sup>low</sup><br>Plasma cells              | 0.06 ± 0.008            | 1.0 ± 0.28*          | 1.1 ± 0.15**                 | 0.55 ± 0.15*                     | 0.66 ± 0.29                                          |

<sup>1</sup> n = 3; <sup>2</sup> n = 8; <sup>3</sup> n = 4; <sup>4</sup> n = 7; <sup>5</sup> n = 4. <sup>6</sup>AVG ± SEM, numbers expressed in millions.

\* p < 0.05; \*\* p < 0.01; \*\*\* p < 0.001; (\*) p = 0.06-0.09: versus B6. # p ≤ 0.05; (#) p = 0.06-0.09: versus B6.Nba2
